# Supplementary material
Source: PubMed Central journal article supplement (PMC5649761)
Supplement: supp_WNL.0000000000004418_Figure_e-1.pdf [file supp_WNL.0000000000004418_Figure_e-1.pdf]

**A. Height - Boys**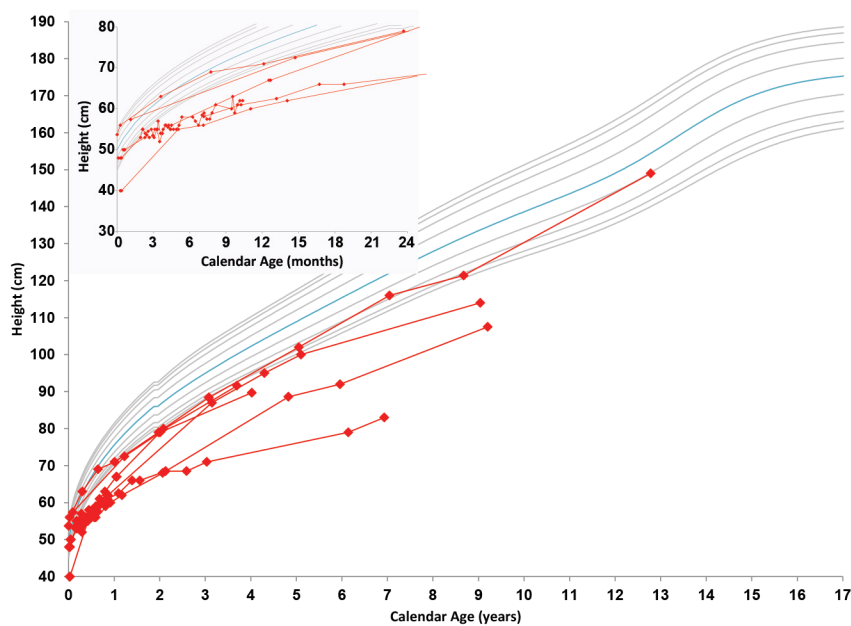**B. Height - Girls**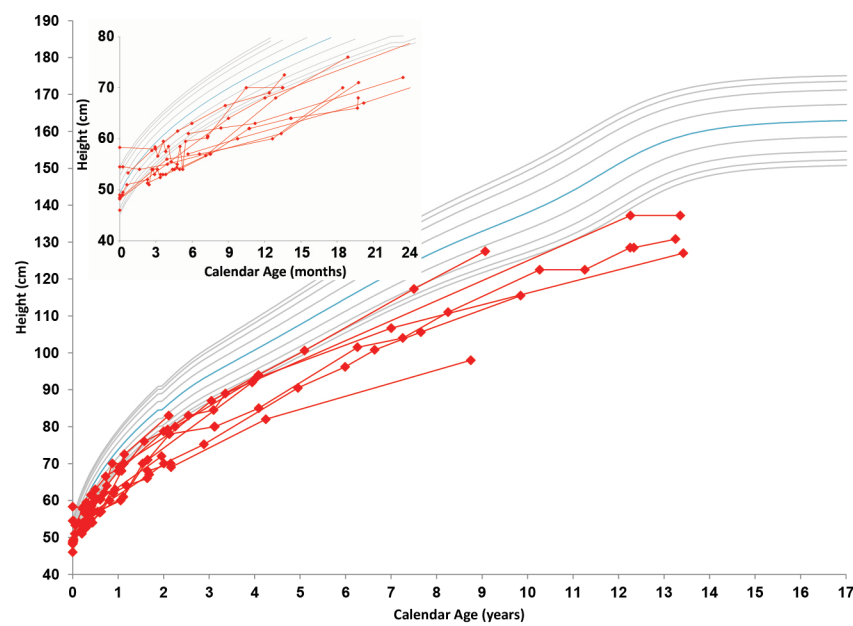**C. Head Circumference - Boys**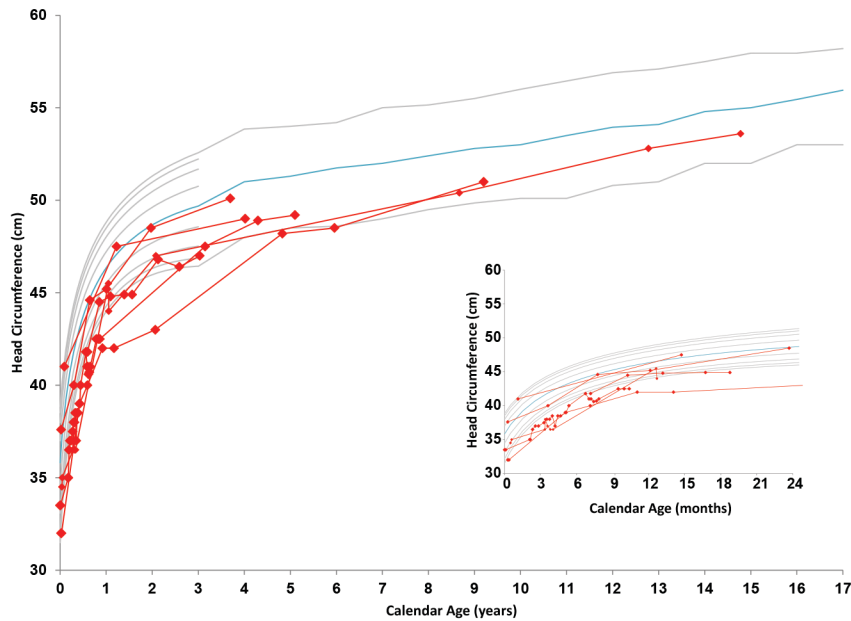**D. Head Circumference - Girls**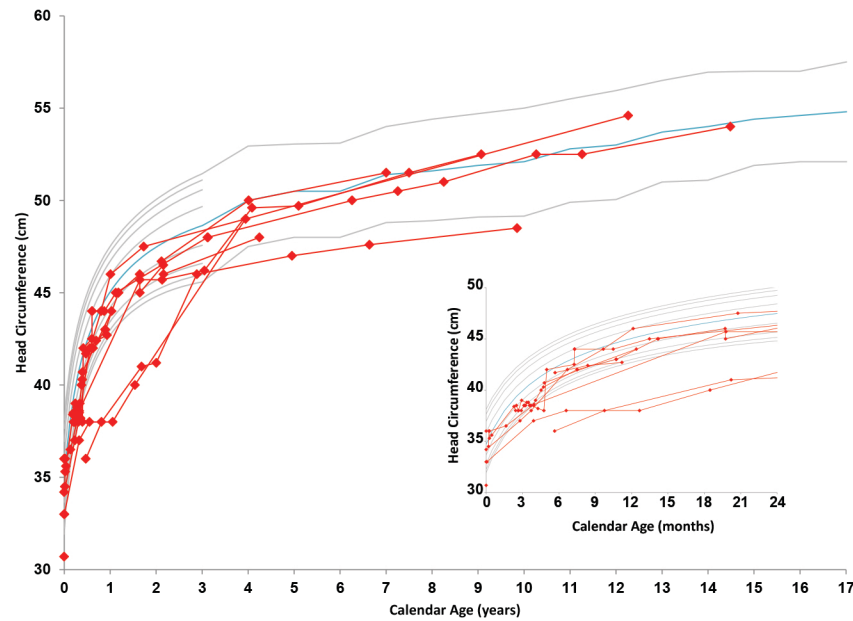

Growth charts showing (A) height and (C) head circumference for the 6 boys and (B) height and (D) head circumference for the 10 girls with follow-up data after hematopoietic stem cell transplantation before 7 weeks of age. Insets in the upper left corner of each graph magnify and highlight growth during the first 24 months of age. The red lines represent individual patients. The gray and blue lines represent standard growth curves (blue = 50th percentile, gray lines = 3rd, 5th, 10th, 25th, 75th, 90th, 95th, and 97th percentiles).
