# Supplementary material
Source: PubMed Central journal article supplement (PMC5649761)
Supplement: supp_WNL.0000000000004418_Figure_e-2.pdf [file supp_WNL.0000000000004418_Figure_e-2.pdf]

Figure e-2 Development after hematopoietic stem cell transplantation for early-infantile Krabbe disease before 7 weeks of age.

A Fine Motor

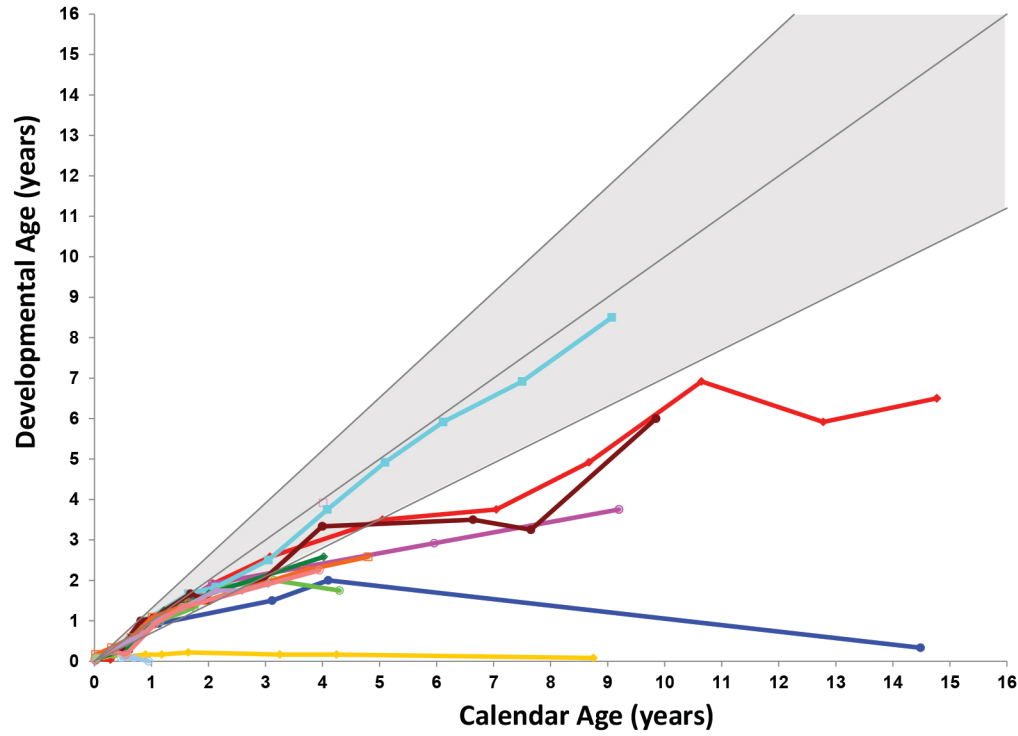

B Adaptive Behavior

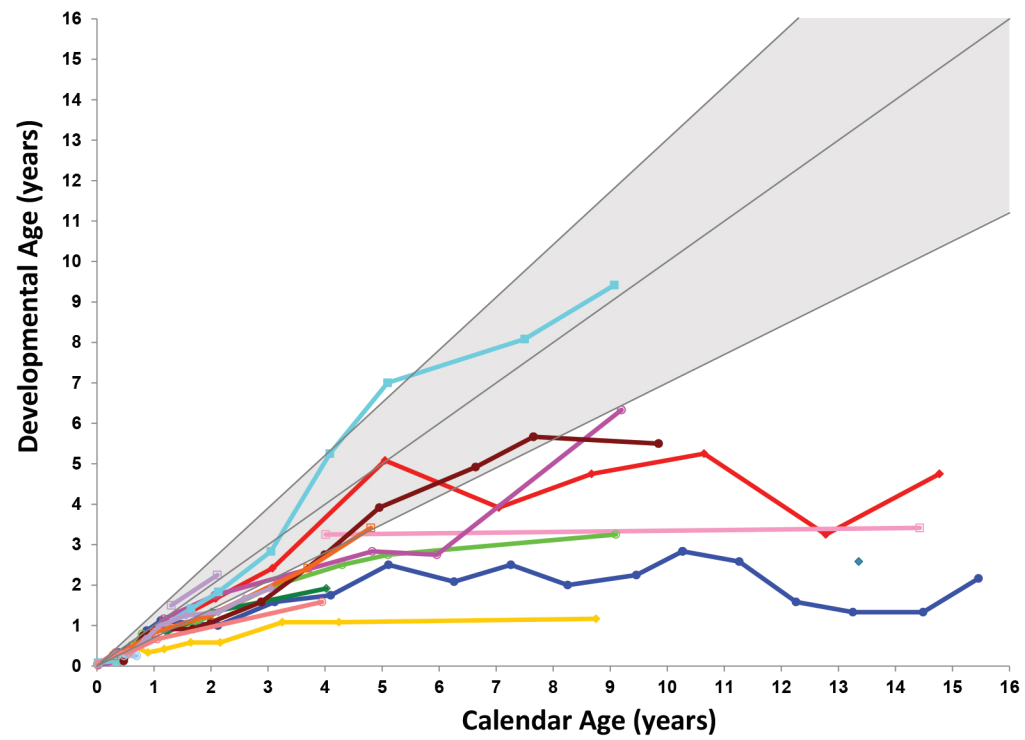

C Receptive Language

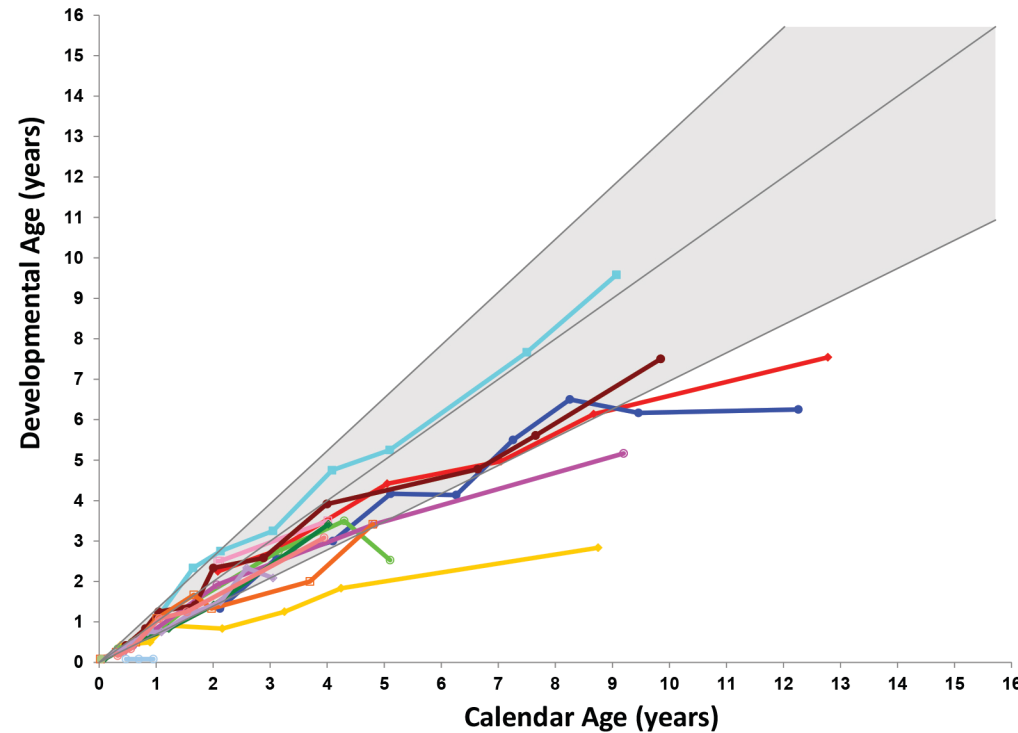

D Expressive Language

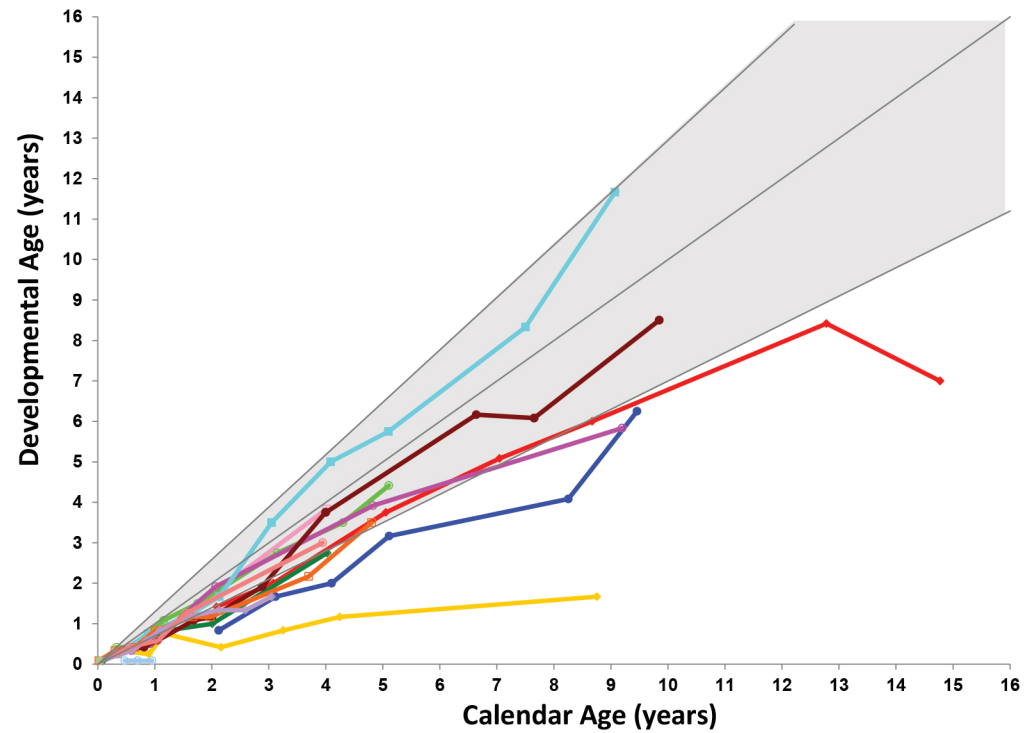

For the 15 children with follow-up data, we used age-equivalent scores (i.e., developmental age) for (A) fine motor, (B) adaptive behavior, (C) receptive language, and (D) expressive language function to allow comparisons across tests and monitor development over time. The colored lines represent individual patients. The shaded gray area represents typical development.
